# Supplementary material for: Hydrothermal Synthesis of a Magnesium Vanadate-Functionalized Reduced Graphene Oxide Nanocomposite for an Efficient Photocatalytic Hydrogen Production
Source: PubMed Central journal article supplement — ACS Omega. 2023 Aug 16;8(34):31493–9. doi: 10.1021/acsomega.3c04476 (PMC10468837; doi:10.1021/acsomega.3c04476), 2023-08-16
Supplement: ao3c04476_si_001.pdf [file ao3c04476_si_001.pdf]

## Supporting Information

# Hydrothermal Synthesis of Magnesium Vanadate Functionalized Reduced Graphene Oxide Nanocomposite for Efficient Photocatalytic Hydrogen Production

Fahad A Alharthi\*, Adel El Marghany, Naaser A. Y. Abduh, Imran Hasan\*

*Department of Chemistry, College of Science, King Saud University, Riyadh-11451, KSA*

Email: [fharthi@ksu.edu.sa](mailto:fharthi@ksu.edu.sa)

Email: [amarghany@ksu.edu.sa](mailto:amarghany@ksu.edu.sa)

Email: [439106262@student.ksu.edu.sa](mailto:439106262@student.ksu.edu.sa)

Email: [iabdulateef@ksu.edu.sa](mailto:iabdulateef@ksu.edu.sa)      Contact: +966-507976713

### Corresponding authors

Imran Hasan (I.H.) Email: [iabdulateef@ksu.edu.sa](mailto:iabdulateef@ksu.edu.sa)      Contact: +966-507976713

Fahad A Alharthi (F.A.A.) Email: [fharthi@ksu.edu.sa](mailto:fharthi@ksu.edu.sa)

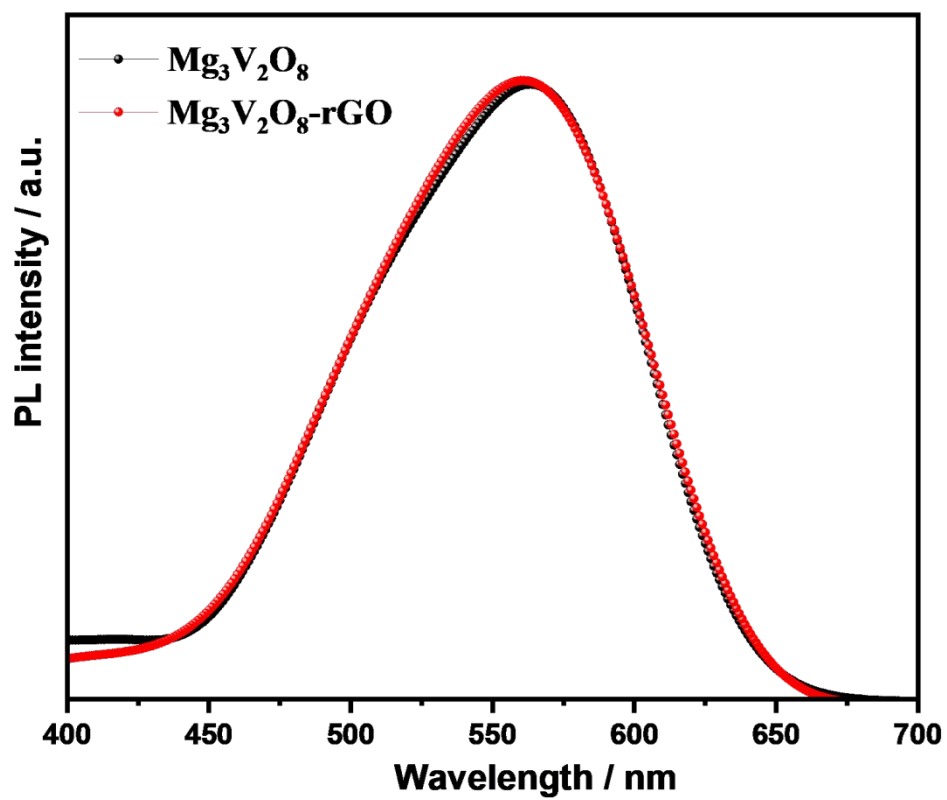

**Figure S1.** PL spectra of  $\text{Mg}_3\text{V}_2\text{O}_8$  (black) and  $\text{Mg}_3\text{V}_2\text{O}_8\text{-rGO}$  (red) composite.

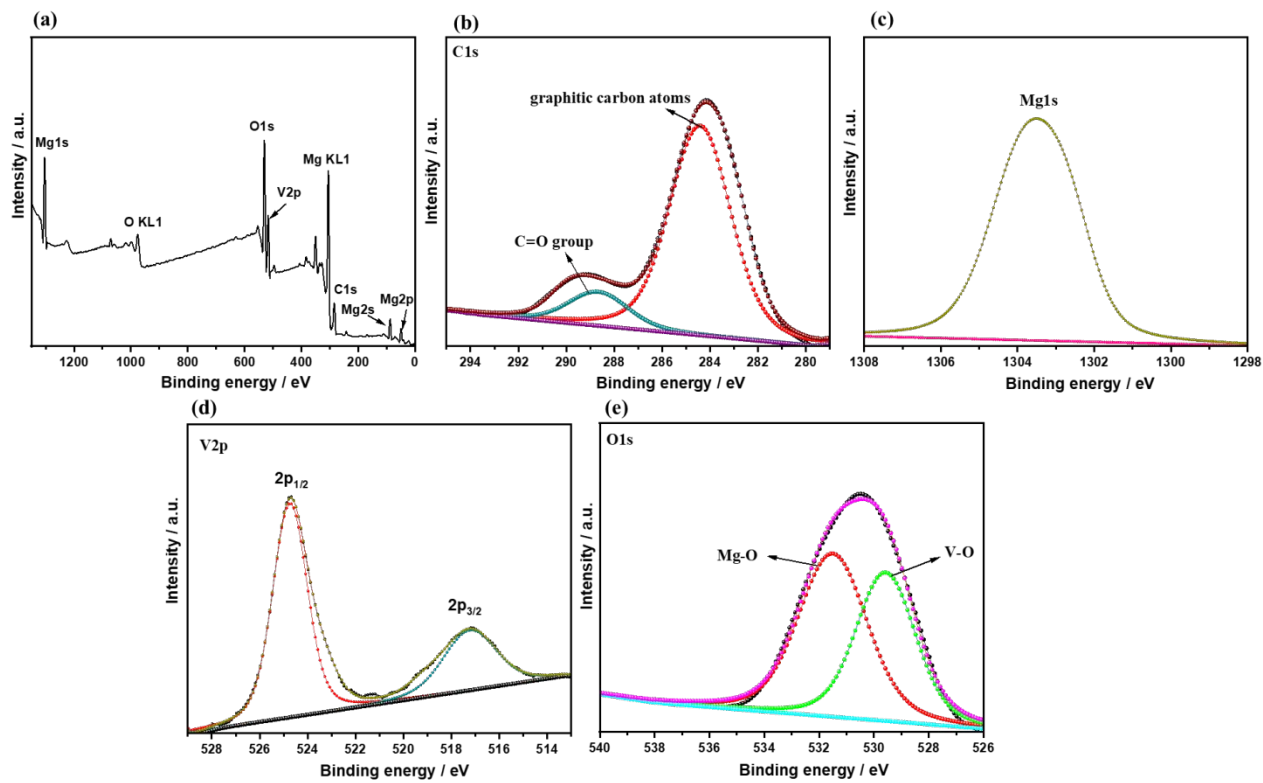

**Figure S2.** XPS survey scan of  $\text{Mg}_3\text{V}_2\text{O}_8\text{-rGO}$  (a) composite. High resolution XPS C1s (b), Mg1s (c), V2p (d) and O1s (e) of  $\text{Mg}_3\text{V}_2\text{O}_8\text{-rGO}$  composite.
